# Supplementary material for: Activation of AKT by hypoxia: a potential target for hypoxic tumors of the head and neck
Source: PubMed Central journal article supplement (PMC3517352; doi:10.1186/1471-2407-12-463), 2012-10-10

Supplemental Figure 2

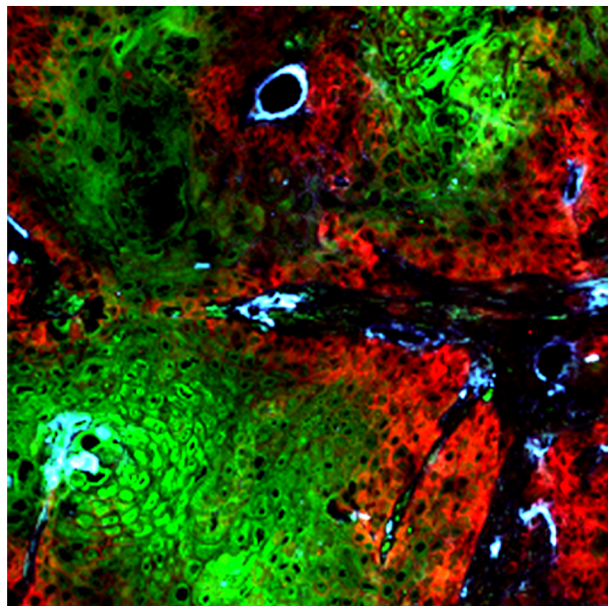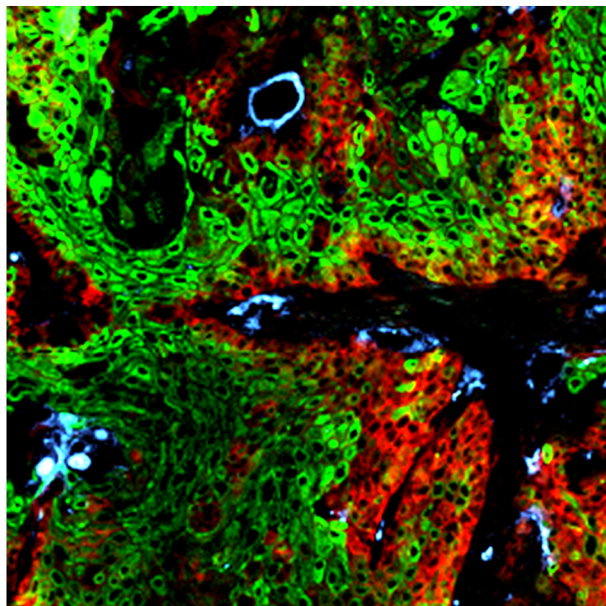

Supplement: 1471-2407-12-463-S2.pdf [file 1471-2407-12-463-S2.pdf]
